# Supplementary material for: A novel robust quantitative Förster resonance energy transfer assay for protease SENP2 kinetics determination against its all natural substrates
Source: Royal Society of Chemistry journal article supplement (doi:10.1039/c5mb00568j), 2015-10-07
Supplement: c5mb00568j1.pdf [file c5mb00568j1.pdf]

## Supplementary data

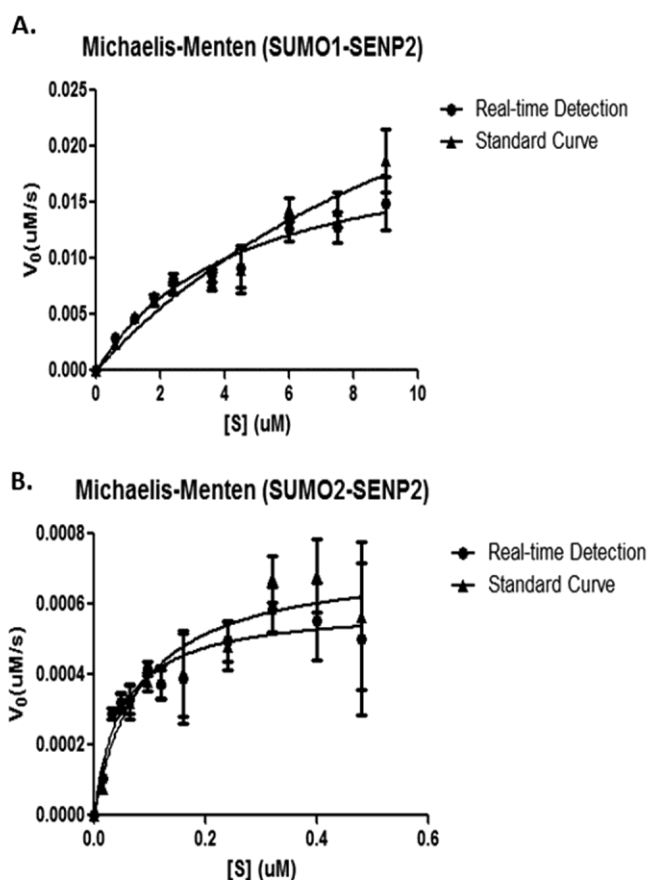

**Figure S1. Comparison of Michaelis-Menten curves of pre-SUMO1 and 2 cleaved by SENP2 from the real-time detection and the standard curve method.**

A. The Michaelis-Menten curves of pre-SUMO1 cleaved by SENP2. B. The Michaelis-Menten curves of pre-SUMO2 cleaved by SENP2. **In each condition, three samples were measured.**

**Table S1.  $k_{cat}/K_M$  of SENP2 for SUMO1,2 analyzed by standard curve method. In each condition, three samples were measured.**

|             | $K_M$ ( $\mu\text{M}$ ) | $k_{cat}$ ( $\text{s}^{-1}$ ) | $k_{cat}/K_M$ ( $\text{M}^{-1}\cdot\text{s}^{-1}$ ) |
|-------------|-------------------------|-------------------------------|-----------------------------------------------------|
| SUMO1-SENP2 | $13.96 \pm 6.74$        | $7.44 \pm 2.49$               | $(5.33 \pm 3.13) \times 10^5$                       |
| SUMO2-SENP2 | $0.081 \pm 0.023$       | $4.83 \pm 0.45$               | $(5.93 \pm 1.78) \times 10^7$                       |
